# Supplementary material for: How well do hydrological models learn from limited discharge data? A comparison of process- and data-driven models
Source: Copernicus journal article supplement (doi:10.5194/egusphere-2025-1076), 2025-03-14
Supplement: Supplementary file 1 [file egusphere-2025-1076-supplement.pdf]

# Supplementary material for "How well do hydrological models learn from limited data? A comparison of process- and data-based models"

Maria Staudinger et al.

## S1 Example of the Douglas Peucker sampling scheme

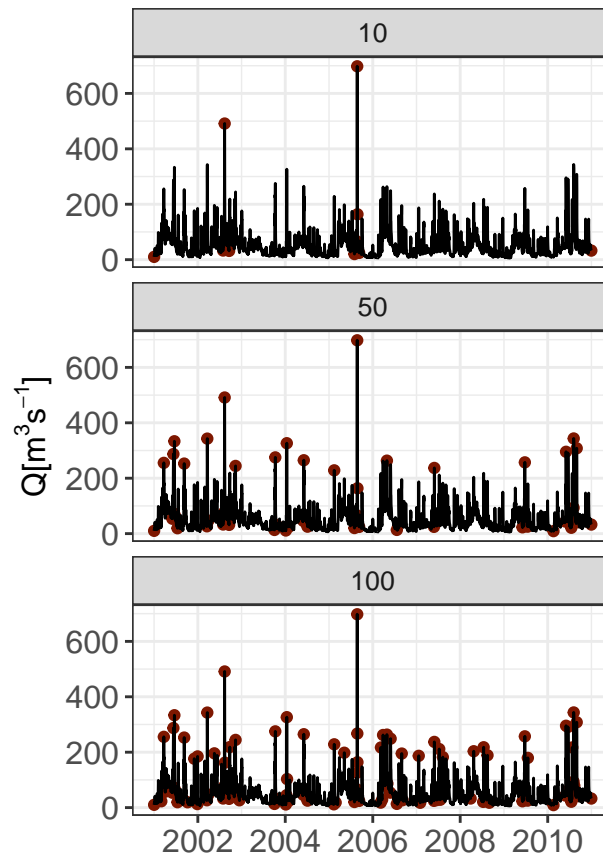

**Figure S1.** Douglas-Peucker sampling points for sample size 10, 50, and 100 for the training period of the Iller catchment.

## S2 Comparison learning curves using the Kling Gupta efficiency (KGE)

Figure S2 compares the learning curves of the different data- and process-based models for the three study catchments Iller, Saale and Selke using the KGE as evaluation metric. Note, that the learning curves are made for the validation period, not the calibration period.

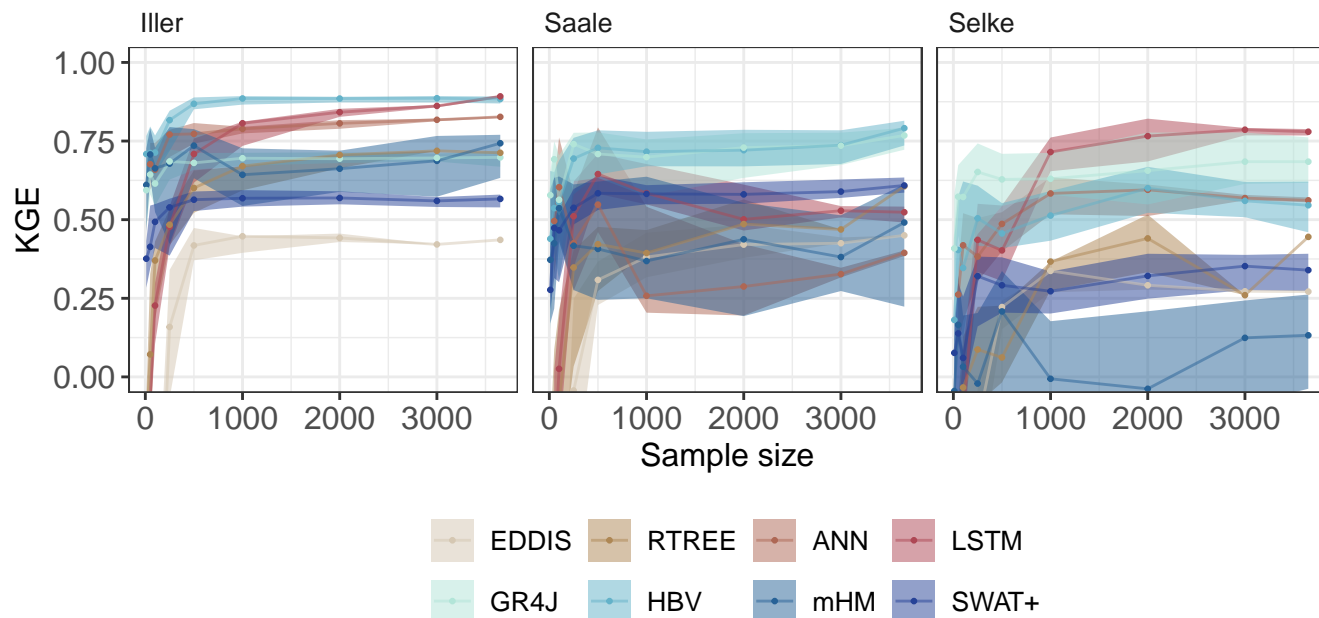

**Figure S2.** Learning curve using the continuous random sampling strategy for the different models and catchments, Kling Gupta efficiency, KGE. The closer the values to 1 the better the model performance.

## S3 Comparison sampling schemes using the Kling Gupta efficiency (KGE)

Figure S3 compares the learning curves of the HBV model for three different sample schemes (optimal = Douglas-Peucker, random, random consecutive) for the three study catchments Iller, Saale and Selke using the KGE as evaluation metric. Note, that the learning curves are made for the validation period, not the calibration period.

## S4 Comparison model performance with different level of discretization of model forcing using the Kling Gupta efficiency (KGE)

Figure S4 compares the KGE values when forcing the HBV model once with lumped and once with semi-distributed, i.e. sub-catchment wise, meteorological input for the three study catchments Iller, Saale and Selke.

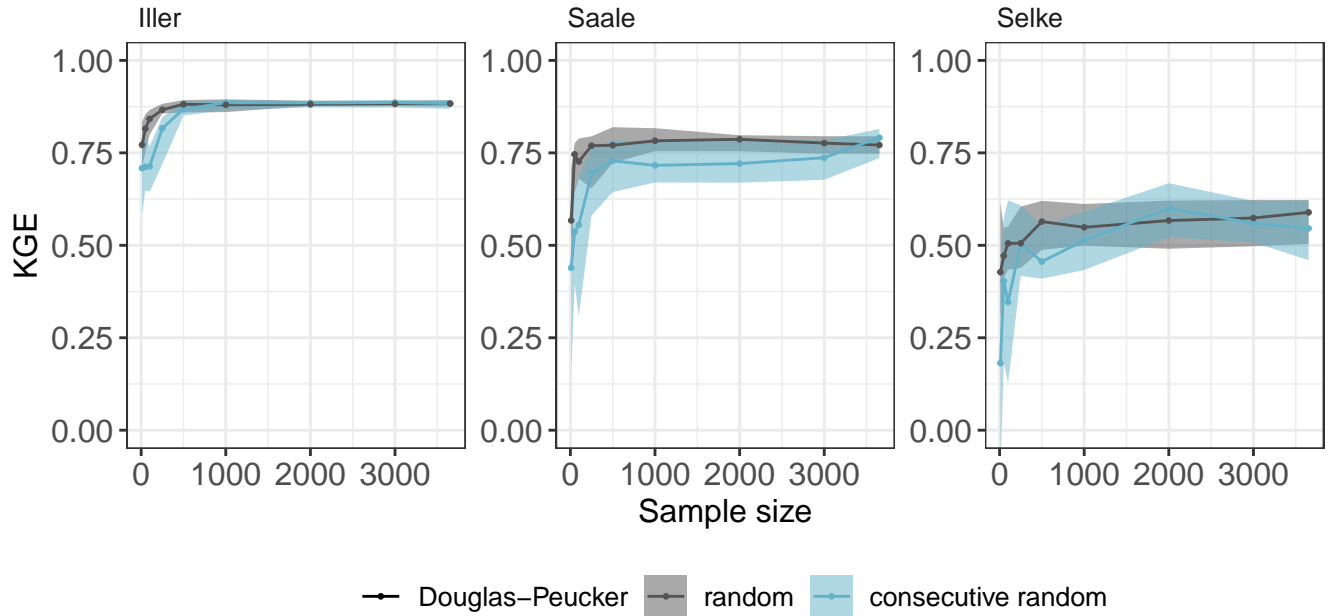

**Figure S3.** Learning curves using Kling Gupta efficiency, KGE. Three different sampling schemes are compared for the HBV model and for the three study catchments Iller, Saale and Selke. The closer the values to 1 the better the model performance.

**Table S1.** Parameter ranges GR4J, plus snow parameters

| Parameter | Min  | Max  | Description                       |
|-----------|------|------|-----------------------------------|
| x01       | 0.01 | 1.5  | Capacity of production store      |
| x02       | -5.0 | 5.0  | Water exchange coefficient        |
| x03       | 1.0  | 500  | Capacity of routing store         |
| x04       | 0.5  | 5.0  | Time parameter of unit hydrograph |
| x05       | 0.0  | 500  | Average annual snow               |
| x06       | 0.01 | 0.99 | Air snow coefficient              |

## S5 Parameter ranges for the different process-based models

## S6 Settings Latin Hypercube Sampling

For the Latin Hypercube Sampling, all model parameters were sampled in their provided range in 1,000 repetitions. All resulting 1,000 model runs, can be considered at once to cover all 10 sample sizes since the sampling strategy is independent of the model performance of previous runs. In contrast, evolutionary algorithms such as dynamically dimensioned search (DDS, Tolson and Shoemaker (2007)) or shuffled complex evolution algorithm (SCE-UA, Duan et al. (1992)) define their search based

**Table S2.** Parameter ranges SWAT+.

| Parameter   | Min  | Max | Description                                |
|-------------|------|-----|--------------------------------------------|
| snomelt_tmp | -2.0 | 2.0 | Snowmelt temperature [° C]                 |
| esco        | 0.0  | 1.0 | Soil evaporation compensation factor       |
| epco        | 0.0  | 1.0 | Plant uptake compensation factor           |
| cn3_swf     | -0.5 | 0.5 | Soil water factor for cn3                  |
| awc         | 0.0  | 0.2 | Available water capacity of soil layer     |
| k           | 0.5  | 2.0 | Saturated hydraulic conductivity           |
| lat_ttime   | 0.5  | 50  | Lateral flow travel time                   |
| perco       | 0.0  | 1.0 | Percolation from upper to lower tank       |
| alpha       | 0.0  | 1.0 | Baseflow factor                            |
| surlag      | 0.2  | 8.0 | surface runoff lag coefficient             |
| cn2         | -10  | 10  | SCS curve number for moisture condition II |

**Table S3.** Parameters ranges HBV model.

| Parameter | Min    | Max  | Description                                                                                                                                           |
|-----------|--------|------|-------------------------------------------------------------------------------------------------------------------------------------------------------|
| TT        | -2.5   | 2.5  | Threshold temperature [° C]; threshold defining over which air temperature snow is melting and under which snow is accumulating                       |
| SFCF      | 0.8    | 1.2  | Snow correction factor[-]; correcting the snow input to account for gauge undercatch (overcatch)                                                      |
| CFMAX     | 2.0    | 15   | degree day factor [mm/d ° C]; defining the rate of snowmelt per degree temperature                                                                    |
| LP        | 0.0    | 1.0  | threshold reduction ETP [-]; reducing the potential ET to estimate actual ET                                                                          |
| FC        | 50     | 1000 | Maximum storage in soil box [mm]; defines the size of the soil bucket                                                                                 |
| BETA      | 1.0    | 5.0  | Shape coefficient [-]; shapes the relation between soil moisture [mm] and fraction of rain (or snowmelt) and thus its relative contribution to runoff |
| Alpha     | 0.0    | 1.0  | Shape coefficient [-]; shapes the relation between water storage in the upper groundwater (gw) bucket and drainage                                    |
| K1        | 0.01   | 0.4  | Recession coefficient (upper gw bucket) [1/d]                                                                                                         |
| PERC      | 0.0    | 6.0  | Max. flow from upper to lower gw box [-]                                                                                                              |
| K2        | 0.0001 | 0.1  | Recession coefficient (lower gw bucket) [1/d]                                                                                                         |
| MAXBAS    | 1.0    | 5.0  | Factor triangular weighting [d]                                                                                                                       |

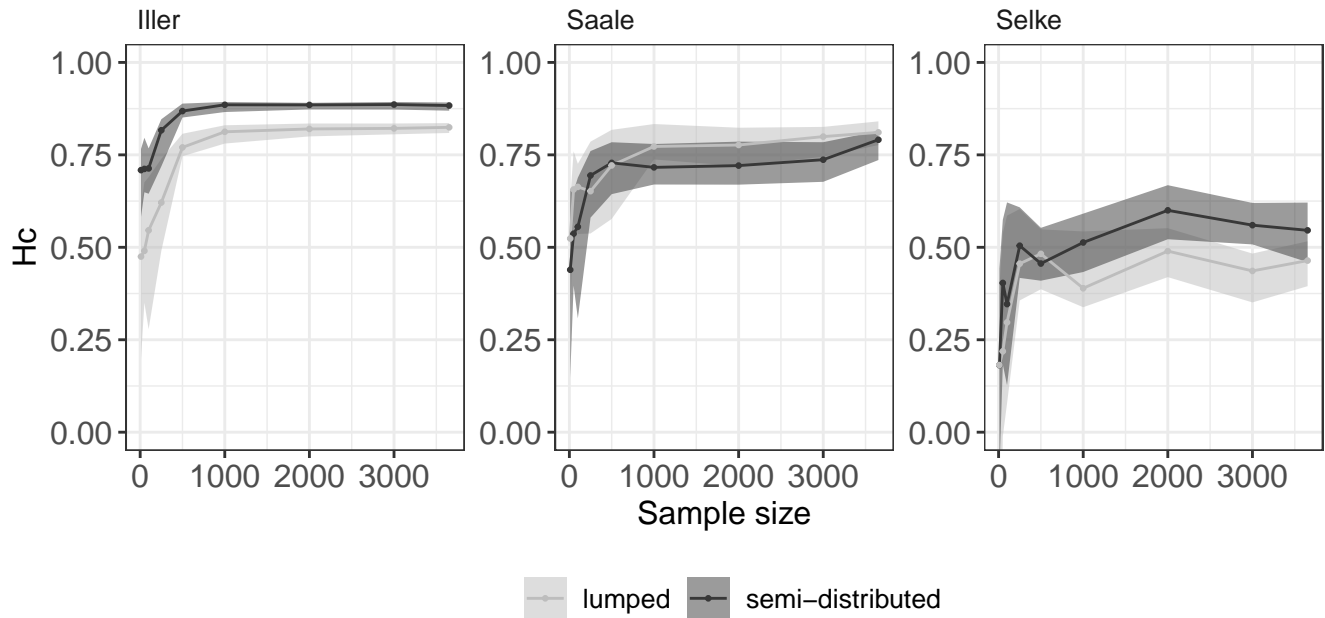

**Figure S4.** Learning curves using Kling Gupta efficiency, KGE. Three different sampling schemes are compared for the HBV model and for the three study catchments Iller, Saale and Selke. The closer the values to 1 the better the model performance.

on the model performance value of previous runs, the sampling would be unique for each sample size. Therefore, each of the 30 repetitions would have to run separately for each sample size (10 times more computational effort). The Latin Hypercube Sampling was performed by using the Python framework SPOTPY (Houska et al., 2015).

**Table S4.** Ranges of global mHM gamma parameters.

| Parameter                   | Min    | Max    | Description                                                                                                  |
|-----------------------------|--------|--------|--------------------------------------------------------------------------------------------------------------|
| snowThresholdTemperature    | -2.0   | 2.0    | Threshold for rain/snow partitioning [° C]                                                                   |
| minCorrectionFactorPET      | 0.7    | 1.3    | Minimum factor for PET correction with aspect [-]                                                            |
| orgMatterContent_forest     | 5.0    | 10.0   | Organic matter content [%] for forest                                                                        |
| orgMatterContent_impervious | 0.0    | 1.0    | Organic matter content [%] for impervious                                                                    |
| orgMatterContent_pervious   | 1.0    | 5.0    | Organic matter content [%] for pervious                                                                      |
| PTF_lower66_5_constant      | 0.75   | 0.8    | Zacharias PTF parameters below 66.5% sand content                                                            |
| PTF_lower_66_5_Db           | -0.27  | -0.25  | Zacharias PTF parameters below 66.5% for mineral bulk density                                                |
| PTF_Ks_constant             | -1.2   | -0.285 | PTF parameters for saturated hydraulic conductivity                                                          |
| PTF_Ks_sand                 | 0.0006 | 0.026  | PTF parameters for saturated hydraulic conductivity for sand                                                 |
| PTF_Ks_clay                 | 0.003  | 0.013  | PTF parameters for saturated hydraulic conductivity for clay                                                 |
| infiltrationShapeFactor     | 1.0    | 4.0    | Shape factor for partitioning effective precipitation into runoff and infiltration based on soil wetness [-] |
| slowInterflowRecession_Ks   | 1.0    | 30     | Multiplier for variability of saturated hydraulic conductivity to derive slow interflow recession constant   |
| exponentSlowInterflow       | 0.05   | 0.3    | Multiplier for variability of saturated hydraulic conductivity to derive slow interflow exponent             |
| rechargeCoefficient         | 0.0    | 50     | Groundwater rate parameter                                                                                   |

## References

- Duan, Q., Sorooshian, S., and Gupta, V.: Effective and efficient global optimization for conceptual rainfall-runoff models, *Water Resources Research*, 28, 1015–1031, <https://doi.org/https://doi.org/10.1029/91WR02985>, 1992.
- Houska, T., Kraft, P., Chamorro-Chavez, A., and Breuer, L.: SPOTting Model Parameters Using a Ready-Made Python Package, *PLOS ONE*, 10, 1–22, <https://doi.org/10.1371/journal.pone.0145180>, 2015.
- Tolson, B. A. and Shoemaker, C. A.: Dynamically dimensioned search algorithm for computationally efficient watershed model calibration, *Water Resources Research*, 43, <https://doi.org/10.1029/2005WR004723>, cited by: 592, 2007.
